# Supplementary material for: Human Diseased Articular Cartilage Contains a Mesenchymal Stem Cell-Like Population of Chondroprogenitors with Strong Immunomodulatory Responses
Source: PubMed Central journal article supplement (PMC6517884; doi:10.3390/jcm8040423), 2019-03-28
Supplement: jcm-08-00423-s001.pdf [file jcm-08-00423-s001.pdf]

**Table S1.** List of proteins tested by growth factor array.

| <b>Name</b>                                                       | <b>Function</b>                                                                                   |
|-------------------------------------------------------------------|---------------------------------------------------------------------------------------------------|
| <b>AR (Amphiregulin)</b>                                          | Mitogenic                                                                                         |
| <b>EGF (Epidermal Growth Factor)</b>                              | Mitogenic, differentiation                                                                        |
| <b>EGF-R (EGF Receptor)</b>                                       | Binds EGF, mitogenic                                                                              |
| <b>HB-EGF (heparin-binding EGF-like growth factor)</b>            | Activates EGFR mediated signaling                                                                 |
| <b>HGF (Hepatocyte Growth Factor)</b>                             | Mitogenic, angiogenesis, tissue regeneration                                                      |
| <b>NGF<math>\beta</math> (beta Nerve Growth Factor)</b>           | Mitogenic, differentiation                                                                        |
| <b>FGF<math>\beta</math> (beta Fibroblast Growth Factor)</b>      | Mitogenic, angiogenic                                                                             |
| <b>FGF-4</b>                                                      | Mitogenic, tissue regeneration                                                                    |
| <b>FGF-6</b>                                                      | Mitogenic, tissue regeneration                                                                    |
| <b>FGF-7/KGF (Keratinocytes Growth Factor)</b>                    | Mitogenic (keratinocytes), tissue regeneration                                                    |
| <b>G-CSF* (Granulocyte Colony Stimulating Factor)</b>             | Granulocyte production, differentiation, function                                                 |
| <b>GM-CSF* (Granulocyte Macrophage Colony Stimulating Factor)</b> | Granulocyte and macrophage production, differentiation, function                                  |
| <b>M-CSF* (Macrophage Colony Stimulating Factor)</b>              | Macrophage production, differentiation, function                                                  |
| <b>M-CSF-R (Macrophage Colony Stimulating Factor Receptor)</b>    | Binds M-CSF, macrophage production, differentiation, function                                     |
| <b>IGFBP-1 (Insulin like Growth Factor Binding Protein 1)</b>     | Binds IGF-1 and IGF-2, cell migration and metabolism                                              |
| <b>IGFBP-2</b>                                                    | Binds IGF-1 and IGF-2                                                                             |
| <b>IGFBP-3</b>                                                    | Binds IGF-1 and IGF-2, prolongs the half-life of IGFs and alters their interaction with receptors |
| <b>IGFBP-4</b>                                                    | Binds IGF-1 and IGF-2, prolongs the half-life of IGFs and alters their interaction with receptors |

|                                                                                  |                                                                     |
|----------------------------------------------------------------------------------|---------------------------------------------------------------------|
| <b>IGFBP-6</b>                                                                   | Binds IGF-2, association with the epithelial-mesenchymal transition |
| <b>IGF-1</b>                                                                     | Growth and development                                              |
| <b>IGF-sR (Insulin like Growth Factor 1 Receptor)</b>                            | Binds IGF-1                                                         |
| <b>IGF-2</b>                                                                     | Growth and development                                              |
| <b>NT-3 (neurotrophin 3)</b>                                                     | Survival and differentiation (neuron)                               |
| <b>NT-4</b>                                                                      | Survival and differentiation (neuron)                               |
| <b>GDNF (Glial cell Derived Neurotrophic Factor)</b>                             | Survival, differentiation (neurons)                                 |
| <b>PDGF-R<math>\alpha</math> (Platelet Derived Growth Factor Receptor alpha)</b> | Mitogenic (mesenchymal cells)                                       |
| <b>PDGF-R<math>\beta</math></b>                                                  | Mitogenic (mesenchymal cells)                                       |
| <b>PDGF-AA (Platelet Derived Growth Factor subunit AA)</b>                       | Binds and activate PDGF receptor                                    |
| <b>PDGF-AB</b>                                                                   | Binds and activate PDGF receptor                                    |
| <b>PDGF-BB*</b>                                                                  | Binds and activate PDGF receptor                                    |
| <b>PLGF (Placental Growth Factor)</b>                                            | Angiogenesis                                                        |
| <b>VEGF-A (Vascular Endothelial Growth Factor A)</b>                             | Angiogenesis                                                        |
| <b>VEGF-D</b>                                                                    | Angiogenesis, lymphangiogenesis, endothelial cell growth            |
| <b>VEGF-R2 (VEGF Receptor 2)</b>                                                 | Binds VEGFs                                                         |
| <b>VEGF-R3</b>                                                                   | Binds VEGFs                                                         |
| <b>SCF (Stem Cell Factor, kit ligand)</b>                                        | Pleiotropic                                                         |
| <b>SCF-R (SCF Receptor, CD117/c-kit)</b>                                         | Binds SCFs                                                          |
| <b>TGF<math>\alpha</math> (Transforming Growth Factor alpha)</b>                 | Mitogenic, differentiation                                          |
| <b>TGF<math>\beta</math>1*</b>                                                   | Mitogenic, differentiation                                          |
| <b>TGF<math>\beta</math>2</b>                                                    | Mitogenic, differentiation                                          |
| <b>TGF<math>\beta</math>3</b>                                                    | Mitogenic, differentiation                                          |

\*Evaluated also as anti-inflammatory proteins in inflammatory array.

**Table S2.** List of proteins tested by inflammatory array.

| <b>Name</b>                                          | <b>Function</b>                                                                                                                      |
|------------------------------------------------------|--------------------------------------------------------------------------------------------------------------------------------------|
| <b>Eotaxin</b>                                       | Eosinophilic-mediated inflammatory diseases                                                                                          |
| <b>Eotaxin-2</b>                                     | Chemotactic activity on resting T lymphocytes                                                                                        |
| <b>I-309</b>                                         | Secreted by activated T cells, displays chemotactic activity for monocytes                                                           |
| <b>ICAM-1 (intercellular adhesion molecule 1)</b>    | Expressed on endothelial cells and cells of the immune system                                                                        |
| <b>IFN-<math>\gamma</math> (interferon gamma)</b>    | Triggers a cellular response to viral and microbial infections                                                                       |
| <b>1L-1<math>\alpha</math> (interleukin 1 alpha)</b> | Produced by monocytes and macrophages                                                                                                |
| <b>IL-1<math>\beta</math></b>                        | Produced by activated macrophages, mediator of the inflammatory response, involved in cell proliferation, differentiation, apoptosis |
| <b>IL-2</b>                                          | Regulates proliferation of T and B lymphocytes                                                                                       |
| <b>IL-3</b>                                          | Promotes cell growth                                                                                                                 |
| <b>IL-4</b>                                          | Produced by activated T cells, overlapping functions with IL-13                                                                      |
| <b>IL-6</b>                                          | Produced at sites of acute and chronic inflammation, promotes the maturation of B cells                                              |
| <b>IL-6-sR (interleukin 6 soluble receptor)</b>      | Binds IL-6                                                                                                                           |
| <b>IL-7</b>                                          | Regulates B and T cell development                                                                                                   |

|                                                |                                                                                                                                                                                                        |
|------------------------------------------------|--------------------------------------------------------------------------------------------------------------------------------------------------------------------------------------------------------|
| <b>IL-8</b>                                    | Secreted primarily by neutrophils, chemotactic factor, angiogenesis                                                                                                                                    |
| <b>IL-10</b>                                   | Immunoregulation                                                                                                                                                                                       |
| <b>IL-11</b>                                   | Stimulates the T-cell-dependent development of immunoglobulin-producing B cells                                                                                                                        |
| <b>IL-12-p40</b>                               | Acts on T and natural killer cells, expressed by activated macrophages that serve as an essential inducer of Th1 cells development                                                                     |
| <b>IL-12-p70</b>                               | Acts on T and natural killer cells, expressed by activated macrophages that serve as an essential inducer of Th1 cells development                                                                     |
| <b>IL-13</b>                                   | Produced primarily by activated Th2 cells, involved in B-cell maturation and differentiation, down-regulates macrophage activity, inhibits the production of pro-inflammatory cytokines and chemokines |
| <b>IL-15</b>                                   | Regulates T and natural killer cell activation and proliferation                                                                                                                                       |
| <b>IL-16</b>                                   | Chemoattractant, modulator of T cell activation                                                                                                                                                        |
| <b>IL-17</b>                                   | Proinflammatory cytokine produced by activated T cells, stimulates the expression of IL-6, cyclooxygenase-2, enhances the production of nitric oxide                                                   |
| <b>IP-10 (interferon-inducible protein 10)</b> | Stimulates monocytes, natural killer and T-cell migration, modulates the adhesion molecule expression                                                                                                  |
| <b>MCP-1 (Monocyte Chemotactic Protein 1)</b>  | Chemotactic activity for monocytes and basophils                                                                                                                                                       |

|                                                                               |                                                                                                                             |
|-------------------------------------------------------------------------------|-----------------------------------------------------------------------------------------------------------------------------|
| <b>MCP-2</b>                                                                  | Chemotactic activity for monocytes, lymphocytes, basophils and eosinophils                                                  |
| <b>MIG (Monokine-Induced by IFN-gamma)</b>                                    | Chemoattractant for T cells                                                                                                 |
| <b>MIP-1-<math>\alpha</math> (Macrophage Inflammatory Proteins 1 alpha)</b>   | Chemotactic, proinflammatory                                                                                                |
| <b>MIP-1-<math>\beta</math></b>                                               | Chemotactic, proinflammatory                                                                                                |
| <b>MIP-1-<math>\delta</math></b>                                              | Chemotactic for T cells and monocytes                                                                                       |
| <b>RANTES (Regulated on Activation, Normal T Cell Expressed and Secreted)</b> | Chemoattractant for blood monocytes, memory T helpers, eosinophils                                                          |
| <b>TNF-<math>\alpha</math> (Tumor Necrosis Factor alpha)</b>                  | Mainly secreted by macrophages, proinflammatory, regulates cell proliferation, differentiation, apoptosis, lipid metabolism |
| <b>TNF-<math>\beta</math></b>                                                 | Produced by lymphocytes, mediates inflammatory, and immunostimulatory responses                                             |
| <b>sTNF-RI (soluble Tumor Necrosis Factor Receptor I)</b>                     | Binds and inhibits TNF- $\alpha$                                                                                            |
| <b>sTNF-RII</b>                                                               | Binds and inhibits TNF- $\alpha$                                                                                            |
| <b>TIMP-2 (Tissue Inhibitor of Metalloproteinases 2)</b>                      | Inhibits the matrix metalloproteinases, suppress the proliferation of endothelial cells                                     |

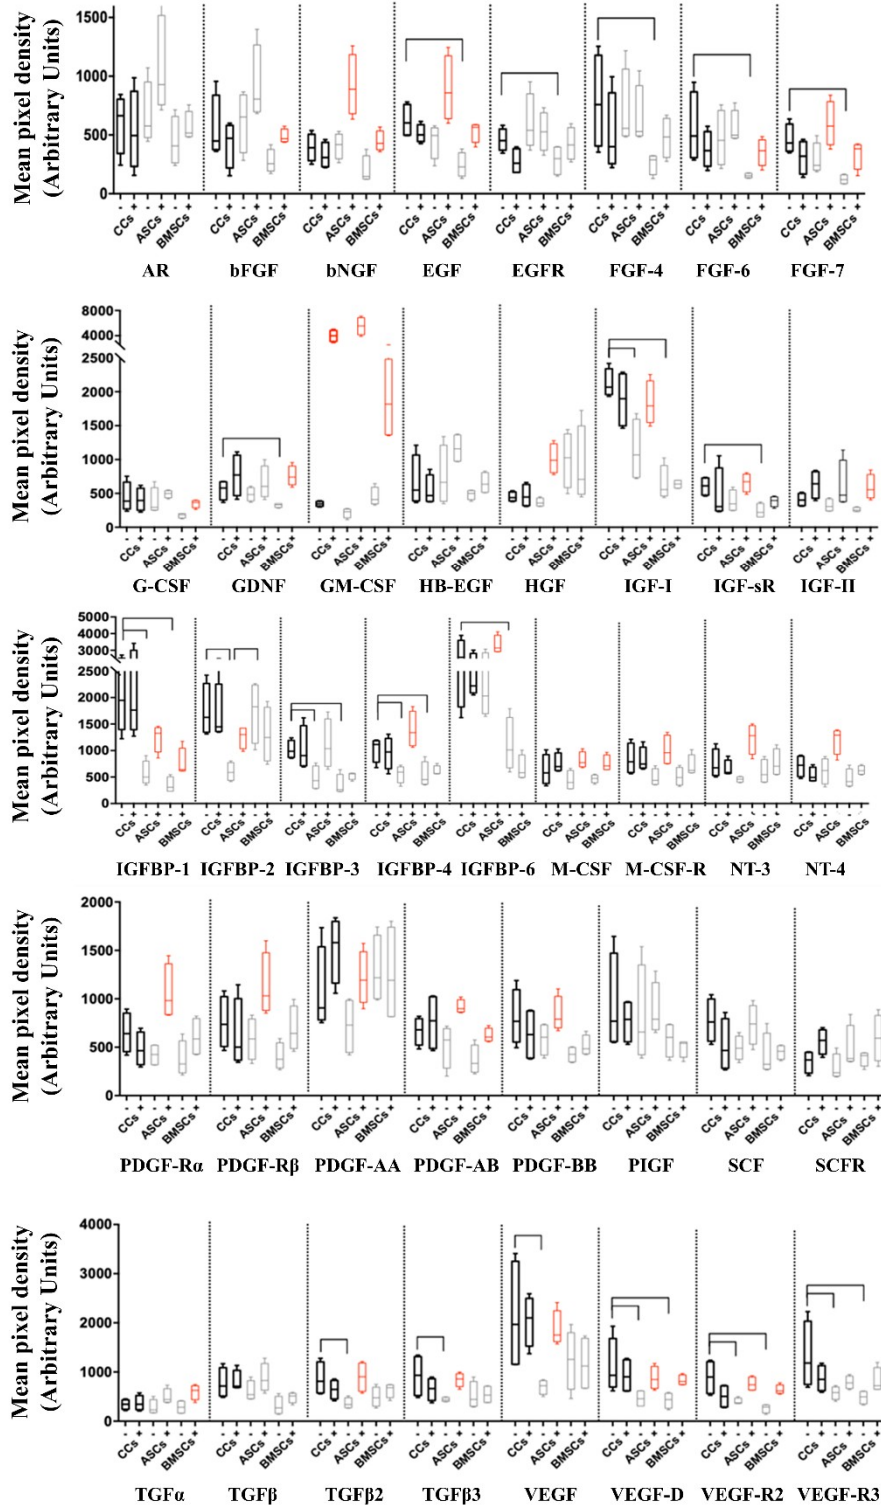

**Supplementary Figure 1. Growth factors secretion.** Adipose (ASCs)- and bone marrow (BMSCs)-derived MSCs and cartilage cells (CCs) at basal (-) and post-stimulation with IL-1 $\beta$  (+). Significant differences ( $p < 0.05$ ) in basal levels are evidenced by connecting lines, whereas differences between basal and post-stimulated samples are indicated as red boxes. Data are expressed as mean  $\pm$  SD ( $n=4$ ).

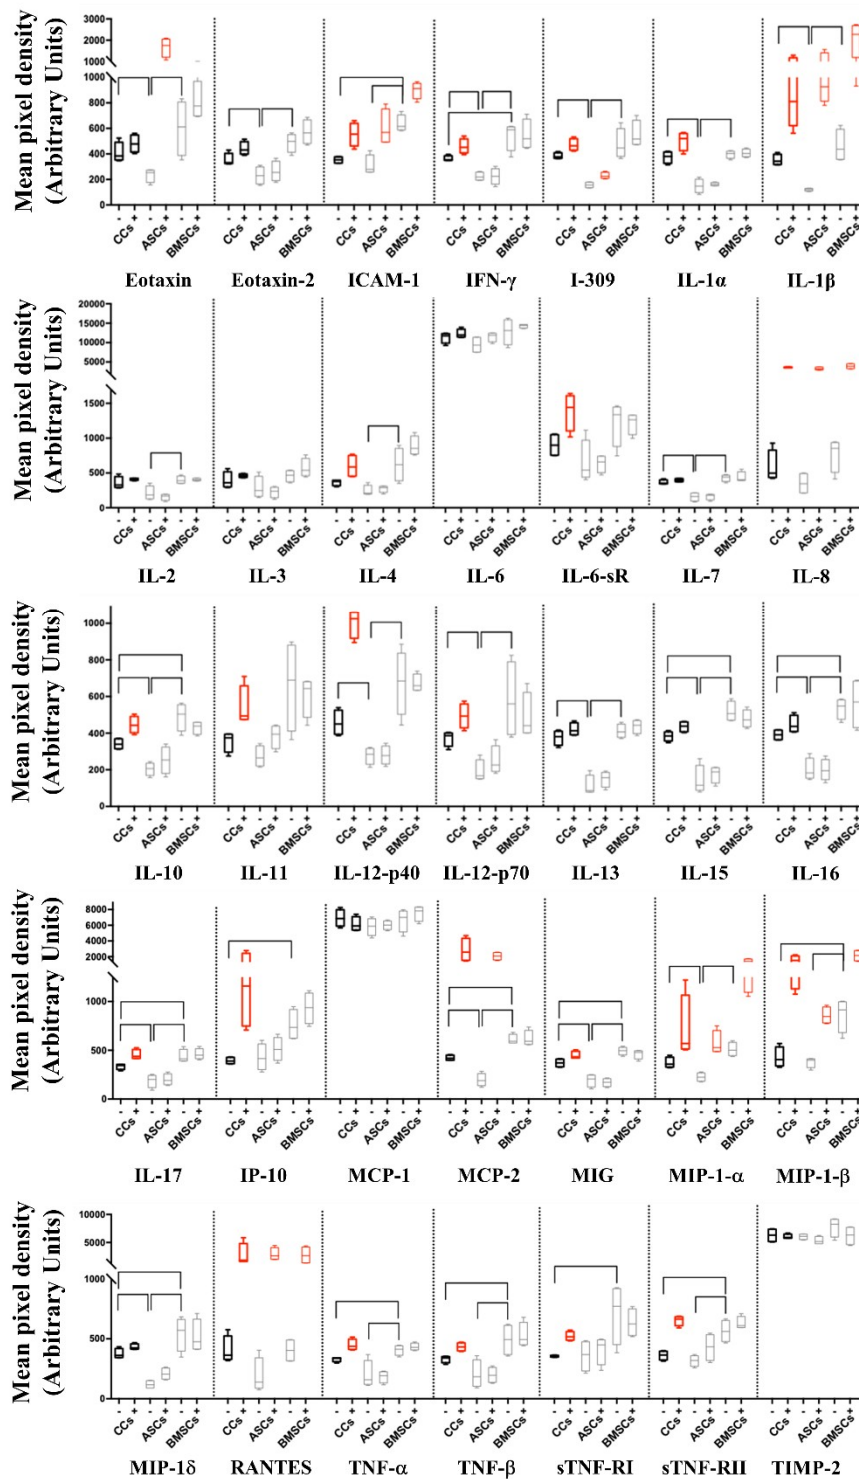

**Supplementary Figure 2. Inflammation-related cytokines secretion.** Adipose (ASCs)-and bone marrow (BMSCs)-derived MSCs and cartilage cells (CCs) at basal (-) and post-stimulation with IL-1 $\beta$  (+). Significant differences ( $p < 0.05$ ) in basal levels are evidenced by connecting lines, whereas differences between basal and post-stimulated samples are indicated as red boxes. Data are expressed as mean  $\pm$  SD ( $n=4$ ).
